# Supplementary material
Source: PubMed Central journal article supplement (PMC5364038)
Supplement: NIHMS852767-supplement-2.pdf [file NIHMS852767-supplement-2.pdf]

## SUPPLEMENTAL MATERIALS

### Supplemental Tables

**Supplemental Table S1 (Related to Figure 3). ERG b-wave parameters of scotopic and photopic light responses.**

| <b>Genotype</b> | <b>I<sub>0.5</sub>, Scotopic<br/>(cd*s/m<sup>2</sup>)</b> | <b>R<sub>max</sub>, Scotopic<br/>(<math>\mu</math>V)</b> | <b>I<sub>0.5</sub>, Photopic<br/>(cd*s/m<sup>2</sup>)</b> | <b>R<sub>max</sub>, Photopic<br/>(<math>\mu</math>V)</b> |
|-----------------|-----------------------------------------------------------|----------------------------------------------------------|-----------------------------------------------------------|----------------------------------------------------------|
| WT              | 0.0008 $\pm$ 0.0006                                       | 543 $\pm$ 49                                             | 0.2 $\pm$ 0.1                                             | 442 $\pm$ 19                                             |
| $\alpha$ 284 KO | 0.006 $\pm$ 0.0004                                        | 221 $\pm$ 31                                             | 1.33 $\pm$ 0.1                                            | 136 $\pm$ 10                                             |
| ELFN1 KO        | 0.005 $\pm$ 0.0005                                        | 125 $\pm$ 5                                              | 0.3 $\pm$ 0.1                                             | 447 $\pm$ 17                                             |

**Supplemental Table S2 (Related to Figure 4). Response Characteristics of Bipolar Cells**

| Genotype   | WT           |            |            | $\alpha 2\delta 4$ KO |               |             |
|------------|--------------|------------|------------|-----------------------|---------------|-------------|
|            | ON-RBC       | ON-CBC     | OFF-CBC    | ON-RBC                | ON-CBC        | OFF-CBC     |
| $R_{\max}$ | -150±30 (11) | -61±13 (7) | 30±7.9 (5) | NA                    | -3.1±0.45 (6) | 11±1.7(7)   |
| $I_{1/2}$  | 13±1.0 (11)  | 14±1.9 (7) | 20±1.4 (5) | NA                    | 13±5.3 (6)    | 13±0.81 (7) |

\*Values of  $R_{\max}$  are in pA, and for  $I_{1/2}$  are in R\*/rod. Number of cells is indicated as (n)

**Supplemental Table S3 (Related to STAR Methods). Primers used for the generation of DNA constructs.**

See Suppl Table S3.xlsx file

## Supplemental Figures

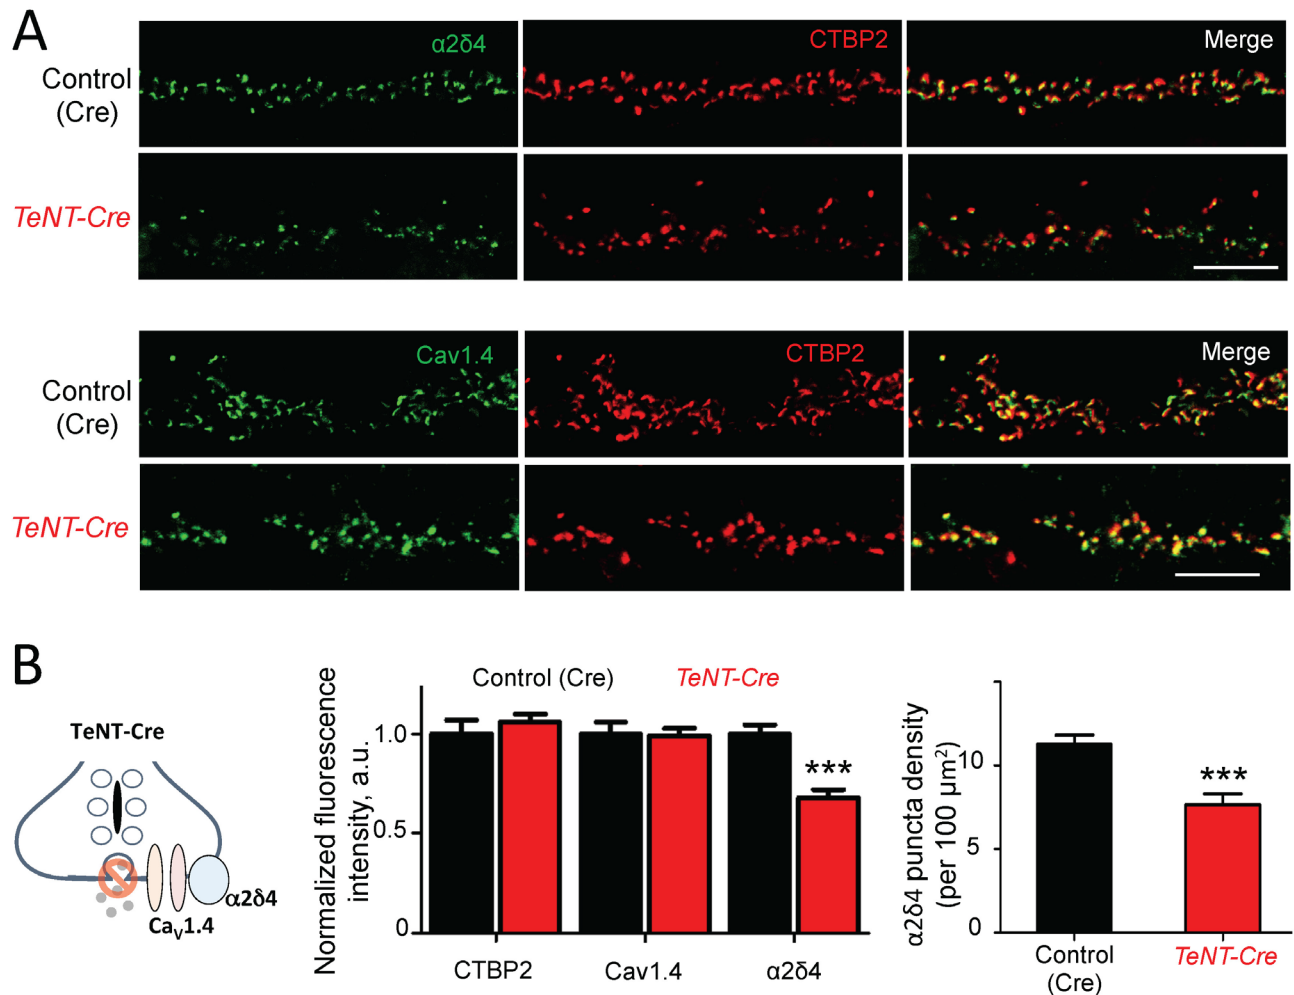

**Supplemental Figure S1 (related to Figure 1). Effect of ablating neurotransmitter release in photoreceptors on Cav1.4 and  $\alpha 2\delta 4$  at the ribbons. A,** Immunohistochemical staining for indicated proteins was performed on retinal cross-sections from mice expressing TeNT toxin in photoreceptors by crossing conditional R26-Floxstop mice with the Pchd21-Cre driver line (TeNT-Cre). Littermate mice lacking the TeNT allele but expressing Cre were used as the control. Scale bar, 10  $\mu m$ . **B,** Scheme illustrating the relationship between the components studied and the effect of TeNT expression on blocking glutamate release from ribbons. Quantification of the observed effects on ribbon morphology (CTBP2) and accumulation of indicated proteins. Two different fields from each retina and two retinas for each genotype were used. \*\*\*,  $p < 0.001$ , t-test for  $\alpha 2\delta 4$  puncta density analysis and two-way ANOVA for fluorescence intensity analysis.

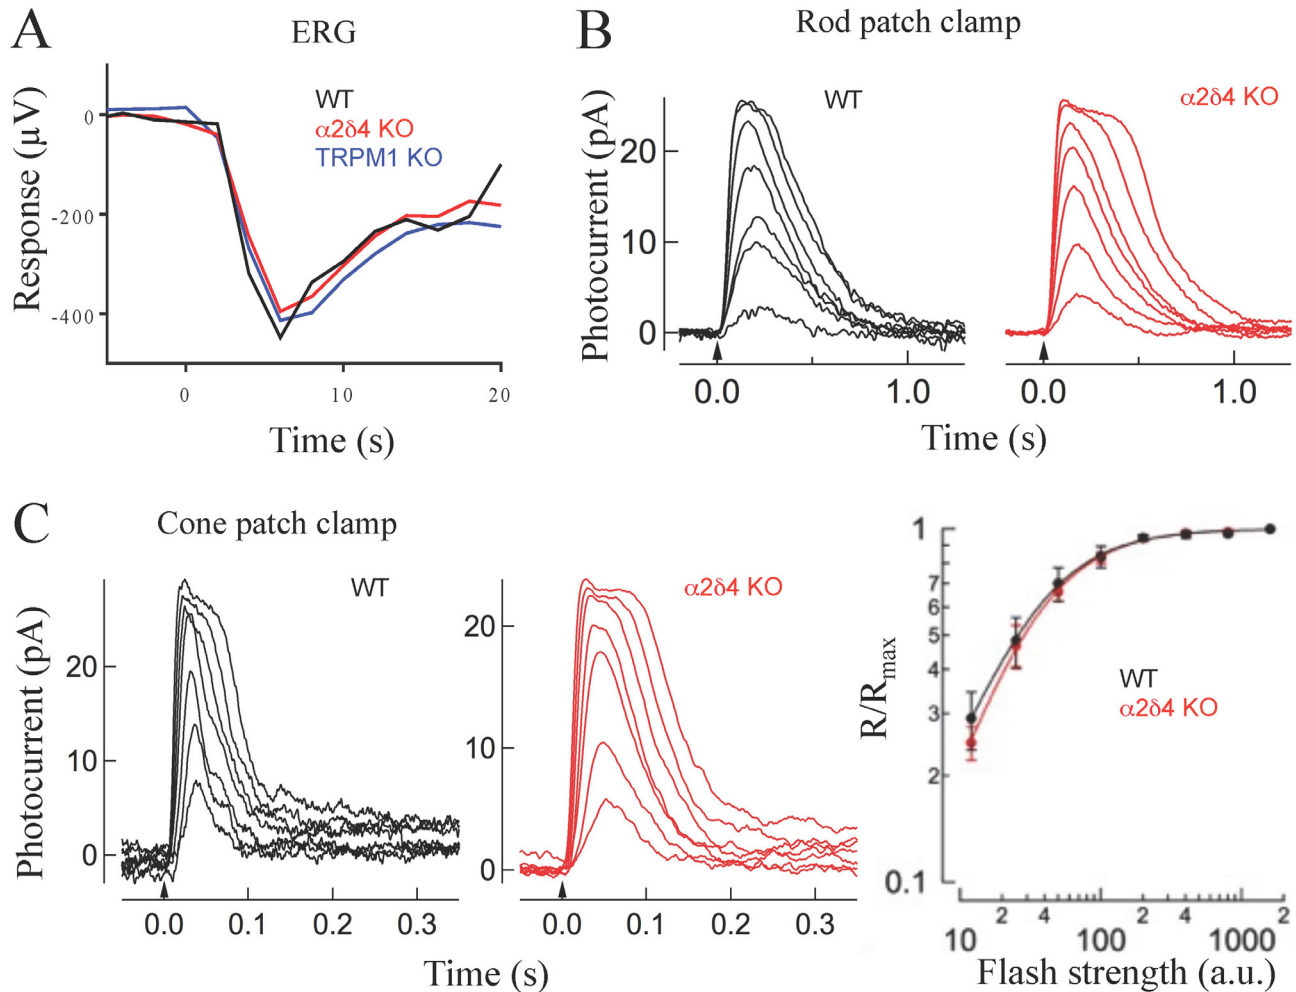

**Supplemental Figure S2 (related to Figure 3). Normal rod and cone phototransduction in  $\alpha 2\delta 4$  knockout retinas.** **A**, Representative ERG a-waves in wild-type (black),  $\alpha 2\delta 4$  (red) and TRPM1 (blue) knockout mice. Flash of  $100 \text{ cd}^*\text{s}/\text{m}^2$  was delivered to eyes of dark-adapted mice. **B**, Flash families of currents recorded from rods in wild-type (black) and  $\alpha 2\delta 4$  knockout (red) retinas. Flash strengths in both families ranged from 2.4 to  $300 \text{ photons } \mu\text{m}^2$ . The maximum rod photocurrents did not differ between wild-type and  $\alpha 2\delta 4$  knockouts ( $16 \pm 6.6 \text{ pA}$ ,  $n=4$  for wild-type;  $20 \pm 7.1 \text{ pA}$ ,  $n=15$  for  $\alpha 2\delta 4$ ; mean $\pm$ SD, paired t-test  $p=0.28$ ) **C**, Flash families and response sensitivities of currents recorded from cones in wild-type (black) and  $\alpha 2\delta 4$  knockout (red) retinas. Flash strengths in both families ranged from 600 to  $55,000 \text{ photons } \mu\text{m}^2$ . The maximum amplitude of cone photocurrents also did not differ between wild-type and  $\alpha 2\delta 4$  knockouts ( $18 \pm 7.9 \text{ pA}$ ,  $n=4$  for wild-type;  $14 \pm 4.3 \text{ pA}$ ,  $n=6$  for  $\alpha 2\delta 4$ ; mean $\pm$ SD, paired t-test  $p=0.67$ ).  $\alpha 2\delta 4$  cones also displayed comparable sensitivity to wild-type cones as shown in the response-intensity relationship (right).

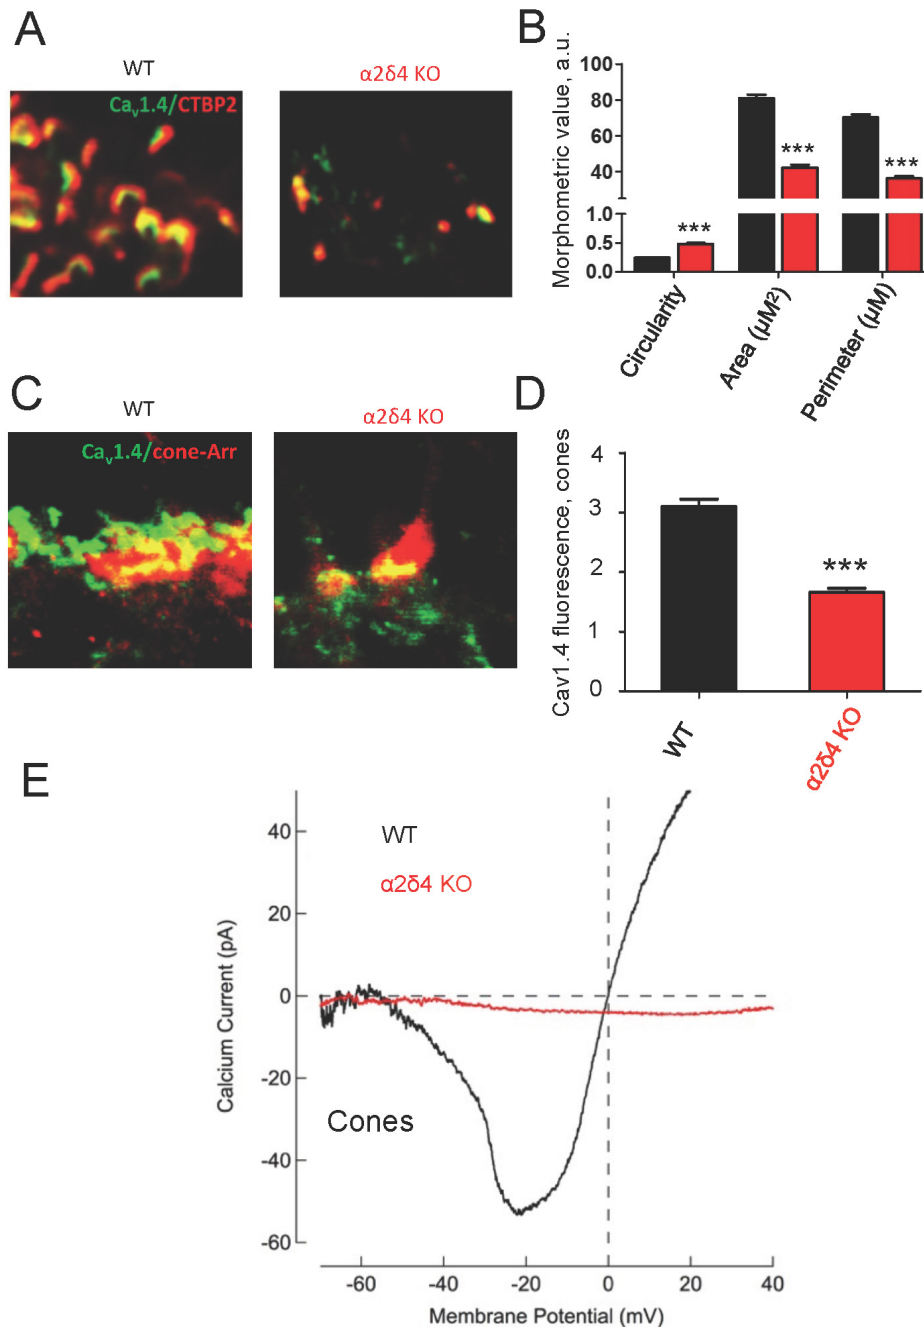

**Supplemental Figure S3 (Related to Figure 5). Changes in ribbon synapses associated with  $\alpha 2\delta 4$  loss.** **A**, Immunohistochemical detection of key ribbon components  $\text{Ca}_v1.4$  and CtBP2 in wild-type (WT) and  $\alpha 2\delta 4$  knockout ( $\alpha 2\delta 4$  KO) retinas. **B**, Quantification of ribbon morphological features. Images from 3 retinas from 3 individual mice for each genotype were analyzed by NIH ImageJ software and the mean values and SEM were potted. \*\*\* $p < 0.01$ , t-test. Circularity is defined as  $4\pi \times [\text{Area}]/[\text{Perimeter}]^2$  with value of 1 indicating perfect circle. As value approaches to 0, it means an increasing elongating shape. **C**, Analysis of  $\text{Ca}_v1.4$  content in cone pedicles. **D**, Quantification of  $\text{Ca}_v1.4$  fluorescence intensity in cone pedicles. Images from 3 retinas from 3 individual mice for each genotype were analyzed by Nikon A1 Image analysis software and the mean values and SEM were potted. \*\*\* $p < 0.01$ , t-test. **E**, Representative  $\text{Ca}_v1.4$  mediated currents measured from individual cones in retinal slices.  $\text{Ca}^{2+}$  currents were measured under voltage-clamp while ramping  $V_m$  from -80 to +40 mV (Majumder et al., 2013).

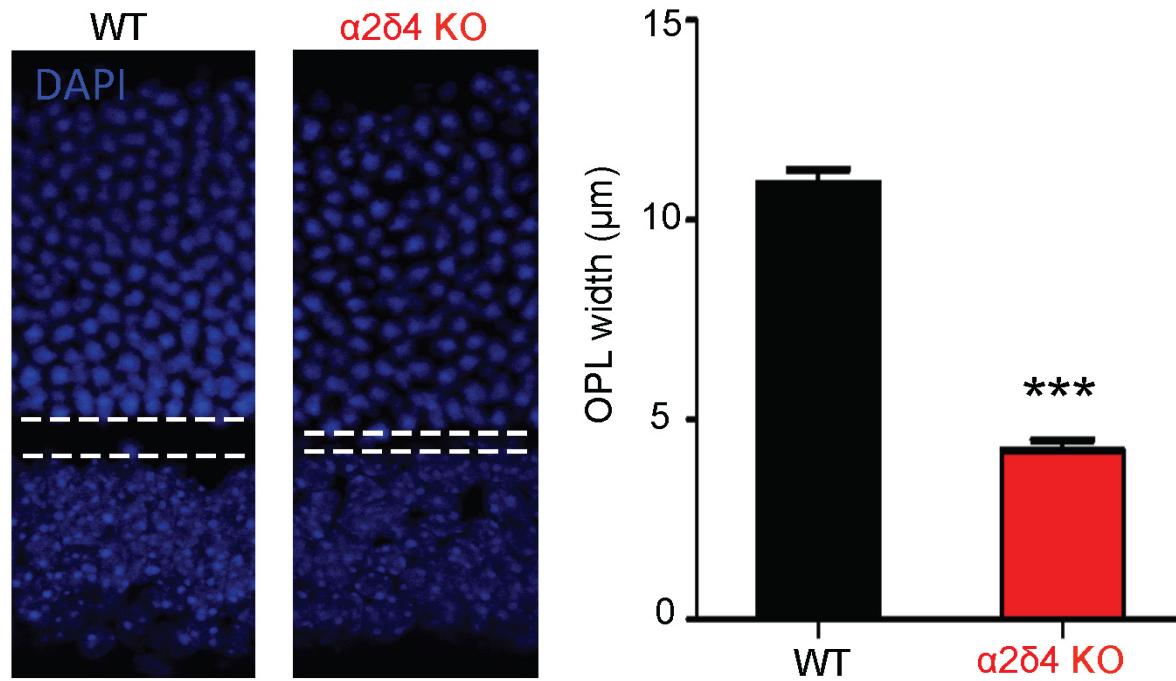

**Supplemental Figure S4 (Related to Figure 6). Quantification of the OPL thickness changes in  $\alpha 2\delta 4$  KO retinas.** Retinas were stained with DAPI and the OPL was defined as nuclei free zone (no DAPI staining between the outer and inner nuclear layers). Its width was determined in 3 mice of each genotype, mean value and SEM are shown. \*\*\*, P<0.001, t-test.

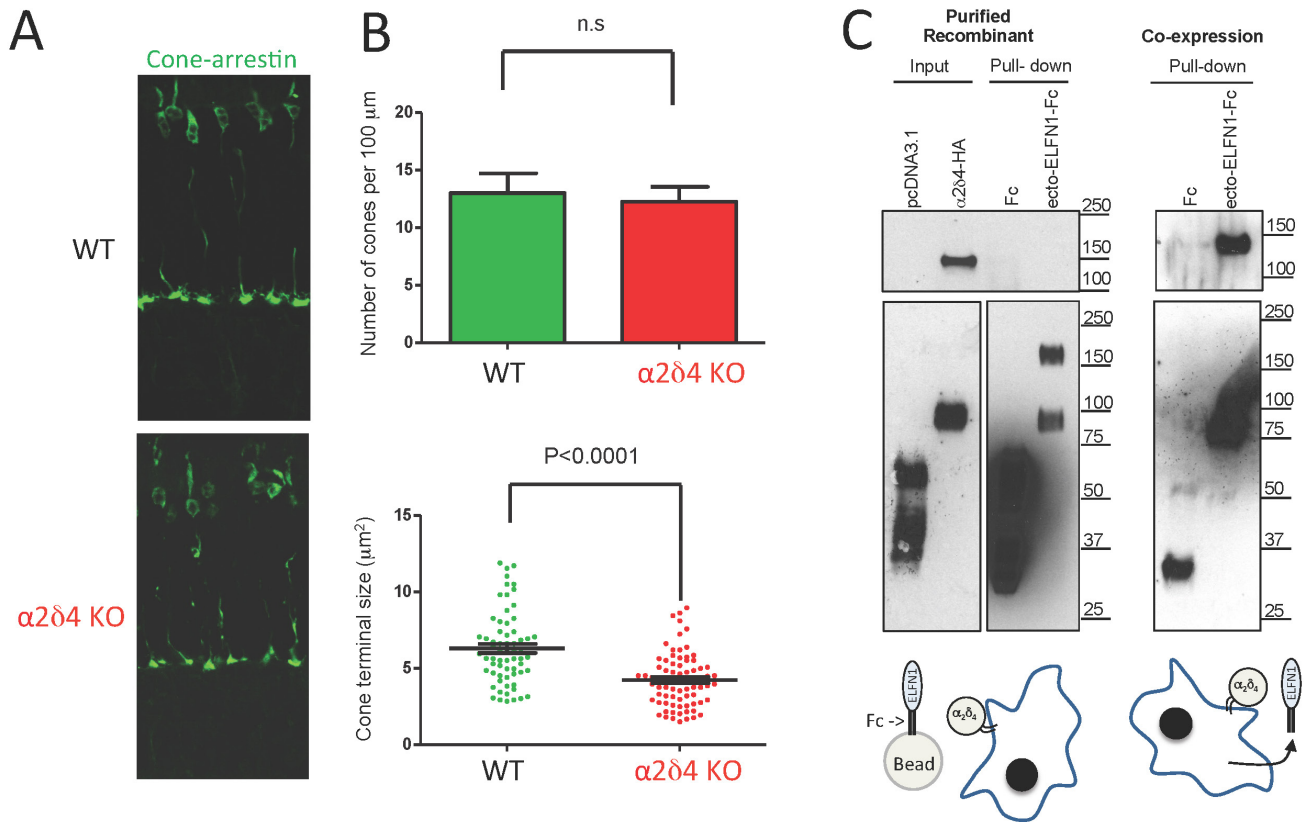



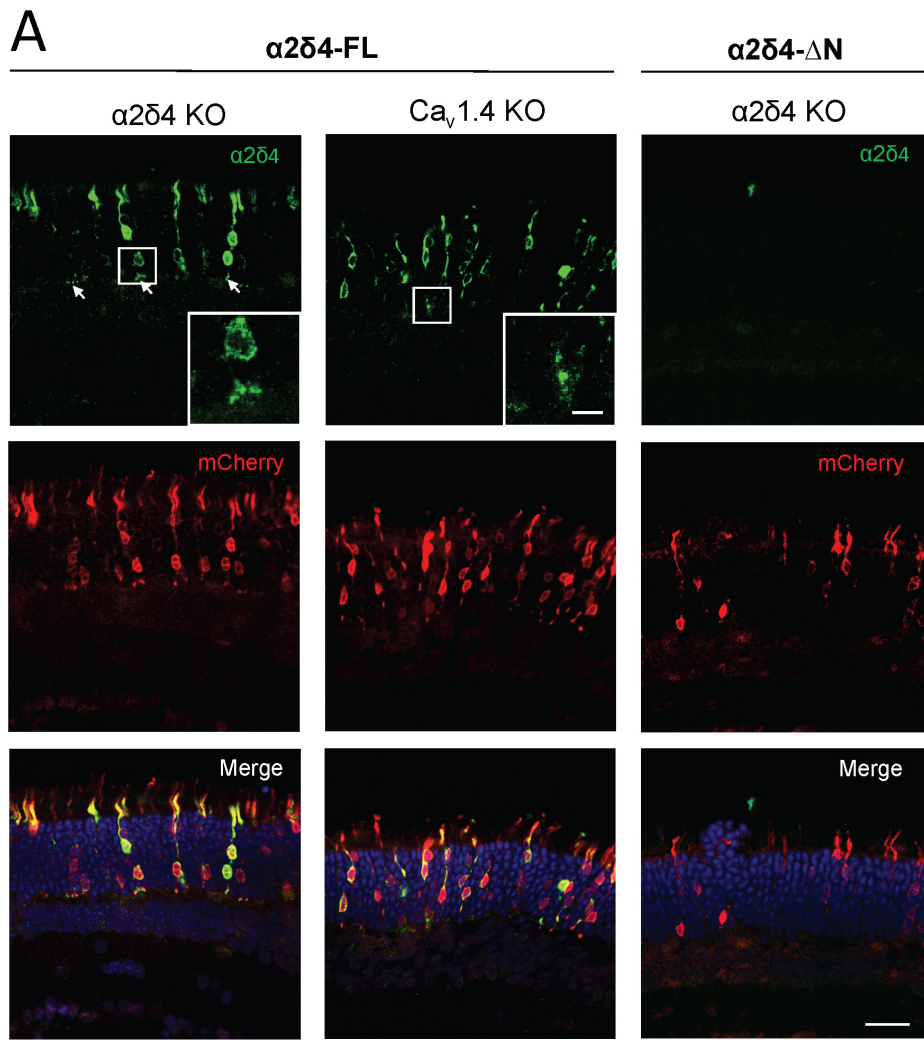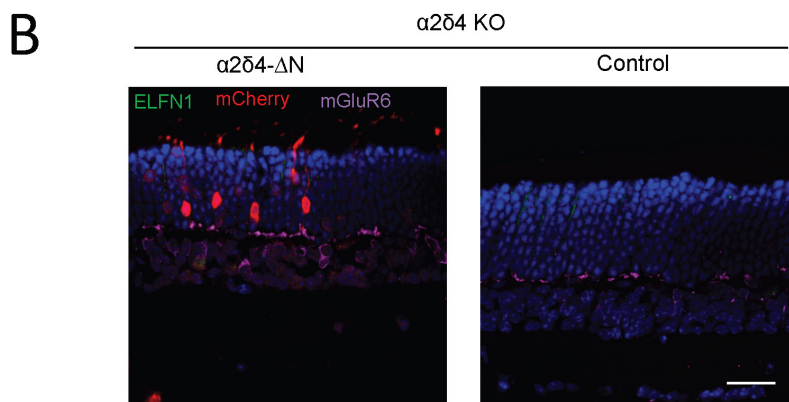

**Supplemental Figure S6 (Related to Figure 8). Expression of  $\alpha 2\delta 4$  in rod photoreceptors by *in vivo* electroporation. **A**, Immunohistochemical detection of  $\alpha 2\delta 4$  constructs expressed in transfected cells of  $\alpha 2\delta 4$  and  $Ca_v1.4$  knockout retinas identified by mCherry co-expression. Scale bar: 20  $\mu$ m. Insert shows  $\alpha 2\delta 4$  content at synaptic terminals. Scale bar: 10  $\mu$ m. **B**, Expression of the  $\alpha 2\delta 4$  mutant with disrupted N-terminal helices did not rescue the *trans*-synaptic ELFN1-mGluR6 complex. Scale bar: 20  $\mu$ m.**
